# Supplementary material for: Hierarchically hollow N-doped carbon-cobalt nanoparticle heterointerface for efficient bifunctional oxygen electrocatalysis
Source: Royal Society of Chemistry journal article supplement (doi:10.1039/d2dt02374a), 2022-01-01
Supplement: d2dt02374a1.pdf [file d2dt02374a1.pdf]

## Supporting Information

Hierarchically hollow N-doped carbon-cobalt  
nanoparticle heterointerface for efficient bifunctional  
oxygen electrocatalysis

Xinyan Leng,<sup>a</sup> Cong Ling,<sup>b</sup> Xiao-Jie Lu,<sup>b</sup> Chenchen Qin,<sup>a</sup> Jian Zhang,<sup>a</sup> Jing-Han Li,<sup>b</sup>  
An-Wu Xu\*<sup>b</sup> and Zhengkun Yang\*<sup>a</sup>

<sup>a</sup>Institutes of Physical Science and Information Technology, Anhui Graphene  
Engineering Laboratory, Key Laboratory of Structure and Functional Regulation of  
Hybrid Materials (Anhui University), Ministry of Education, Hefei, 230601, China

<sup>b</sup>Hefei National Research Center for Physical Sciences at the Microscale, University of  
Science and Technology of China, Hefei, 230026, China.

\*To whom correspondence should be addressed.

Email: [anwuxu@ustc.edu.cn](mailto:anwuxu@ustc.edu.cn)

[yangzk@ustc.edu.cn](mailto:yangzk@ustc.edu.cn)

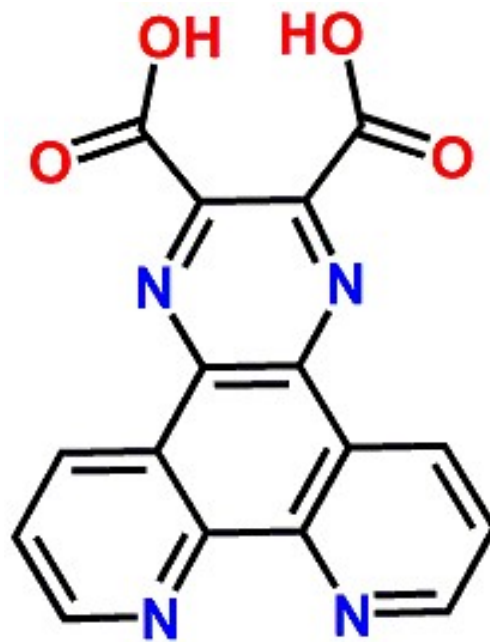

Figure S1. Molecular structure of H<sub>2</sub>PPDA

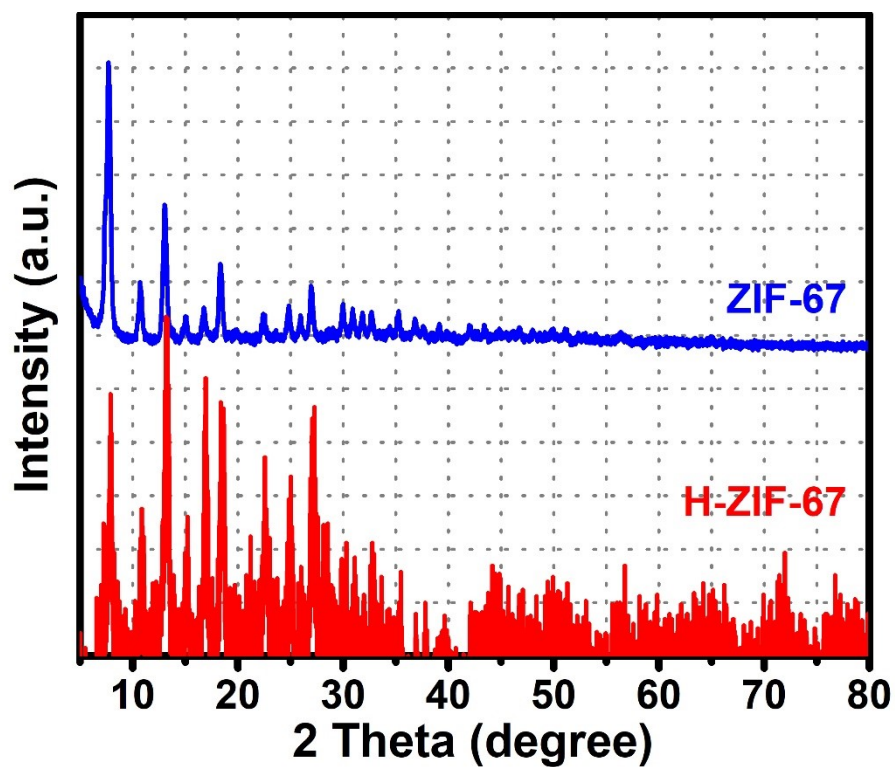

Figure S2. The XRD patterns of as-prepared ZIF-67 and H-ZIF-67 samples.

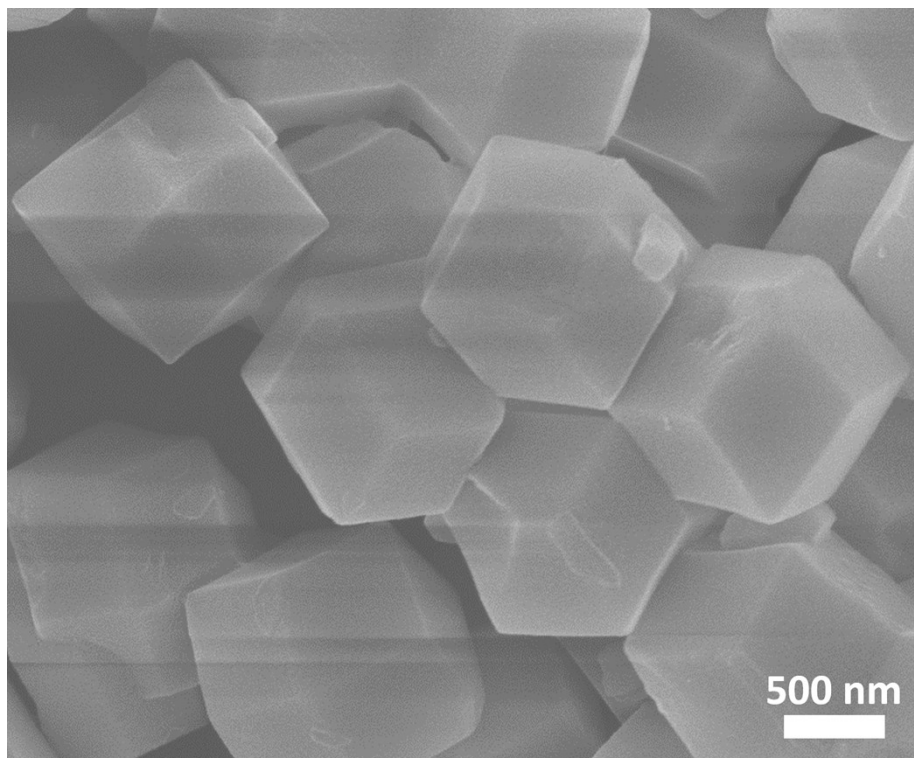

Figure S3. The SEM image of as-prepared ZIF-67 sample.

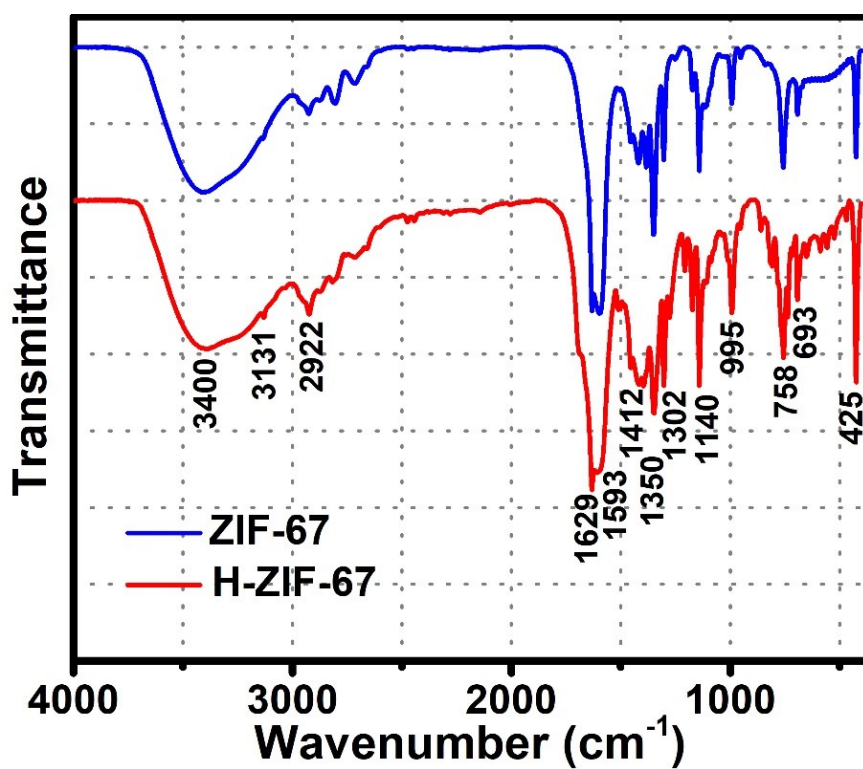

Figure S4. FTIR spectras of as-formed ZIF-67 and H-ZIF-67 samples.

The peak at 425 cm<sup>-1</sup> is due to the Co-N vibrations. The bands at 693 and 753 cm<sup>-1</sup> in

the spectral region are associated with out-of-plane bending of the imidazole ring, while peaks in the region of between 900 and 1350  $\text{cm}^{-1}$  are assigned as in-plane bending. The peaks at 1593 and 1629  $\text{cm}^{-1}$  are attributed to the stretching and bending N–H vibration of the imidazole ring, respectively. The intense and convoluted bands at 1350–1500  $\text{cm}^{-1}$  are associated with the entire ring stretching, whereas two peaks at 2922 and 3131  $\text{cm}^{-1}$  are attributed to the aliphatic and the aromatic C–H stretch of the imidazole, broad peak at 3400  $\text{cm}^{-1}$  corresponds to the N–H stretching vibrations of 2-methylimidazole.

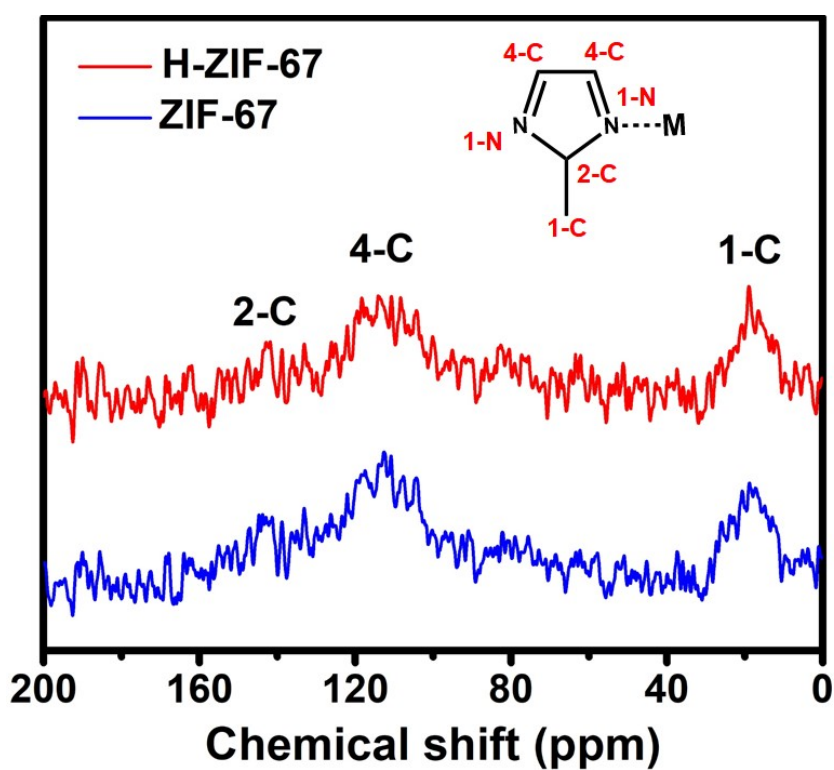

Figure S5.  $^{13}\text{C}$  NMR spectra of ZIF-67 and H-ZIF-67 powders.

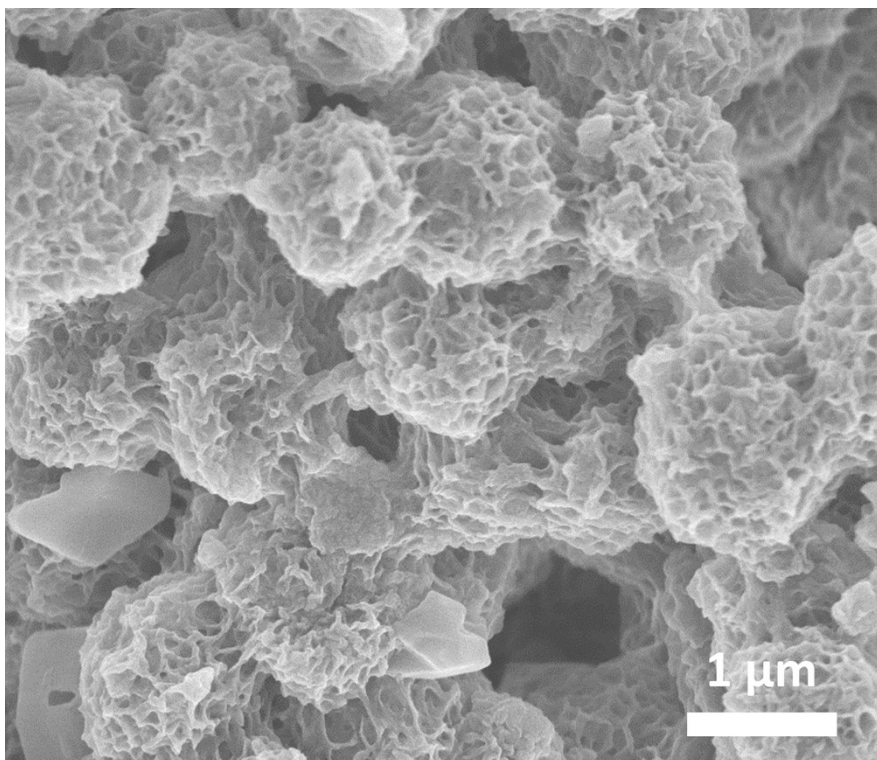

**Figure S6.** The SEM image of as-prepared H-ZIF-67 sample.

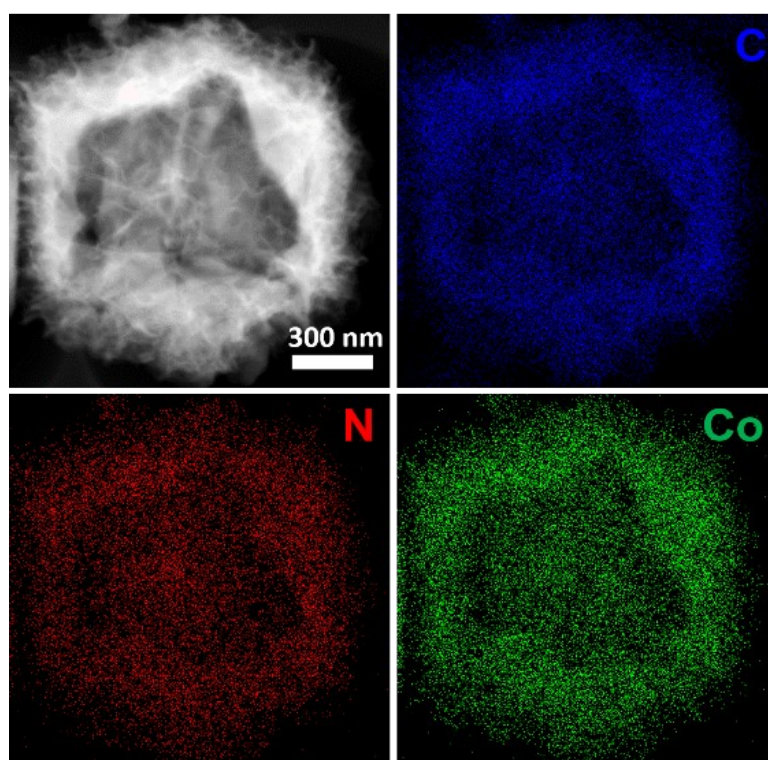

**Figure S7.** The EDS element mapping of as-prepared H-ZIF-67 sample.

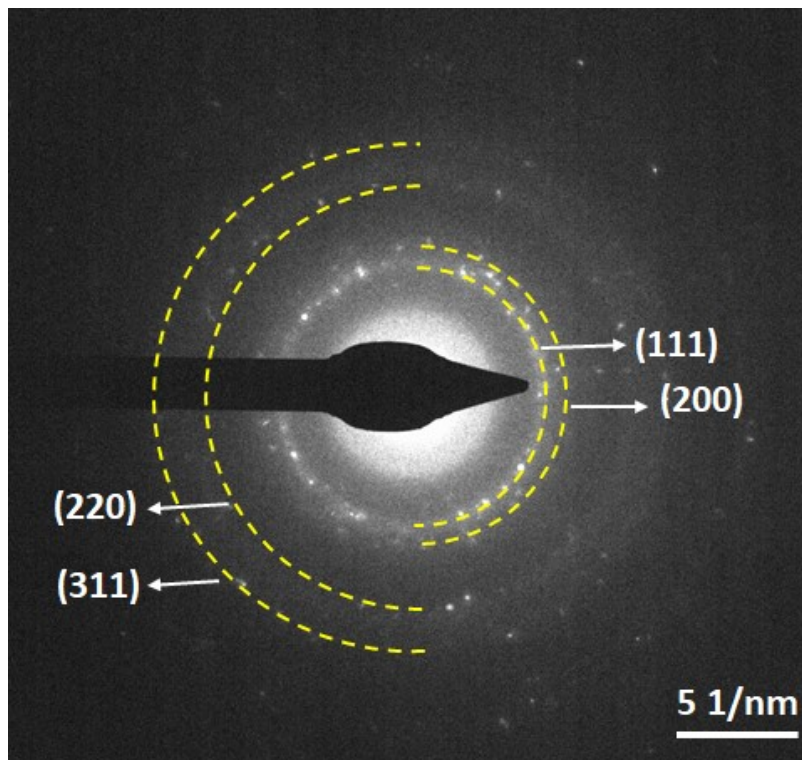

Figure S8. The selected area electron diffraction (SAED) pattern of a single cage.

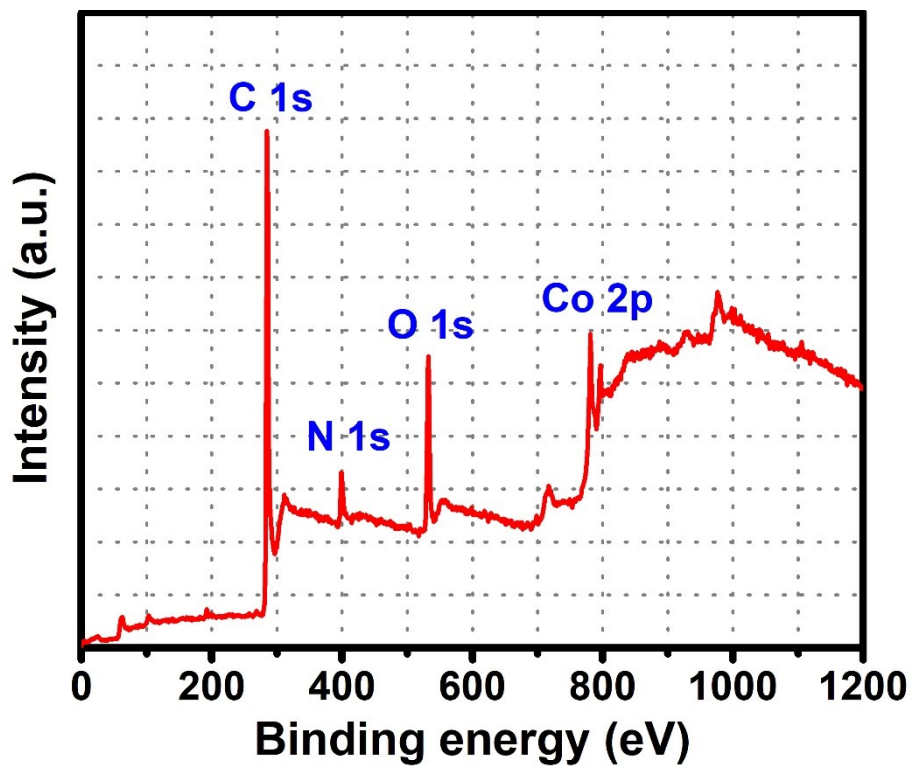

Figure S9. XPS survey scan of Co@HNCs (600) catalyst.

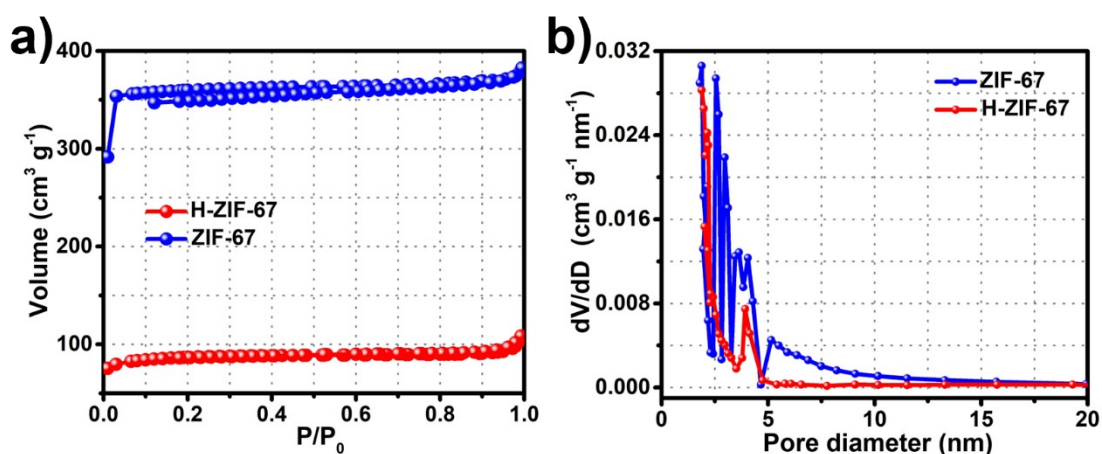

**Figure S10.** (a) N<sub>2</sub> adsorption–desorption isotherms and (b) the corresponding pore distribution of ZIF-67 and H-ZIF-67 samples.

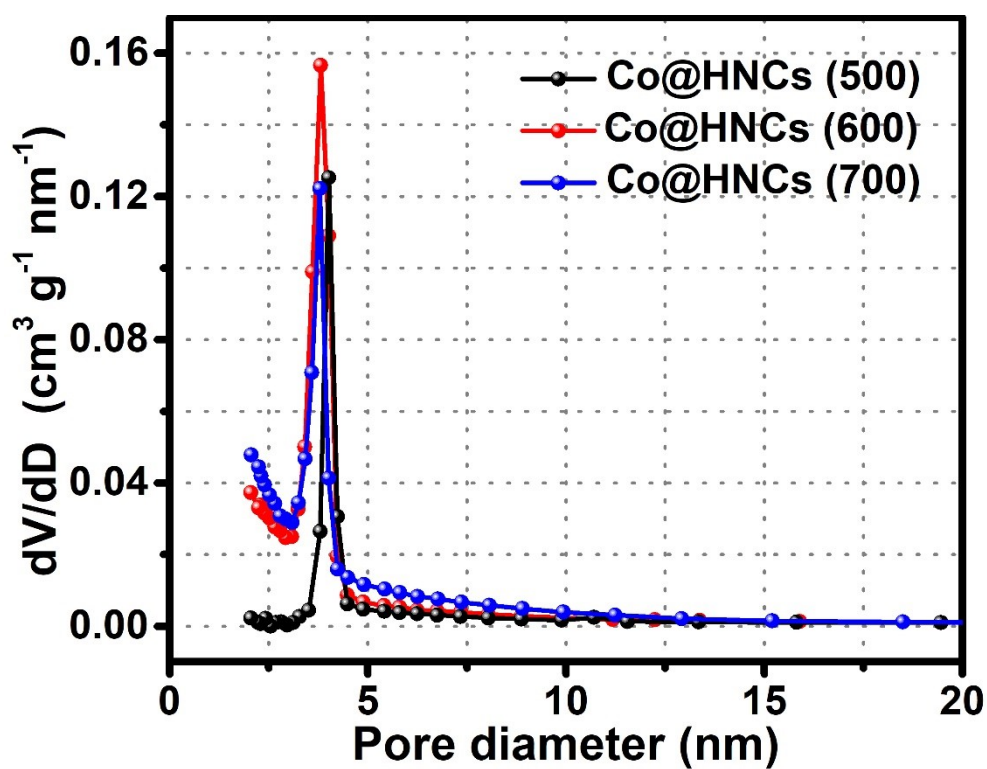

**Figure S11.** The corresponding pore distribution of Co@HNCs (500), Co@HNCs (600) and Co@HNCs (700) catalyst.

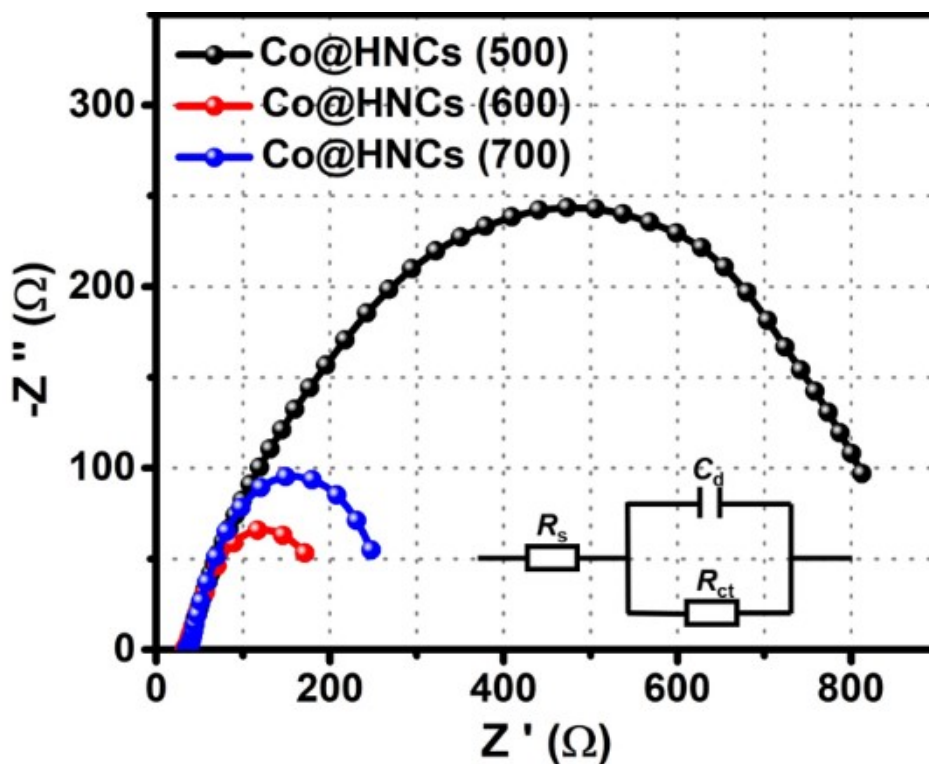

**Figure S12.** Electrochemical impedance spectroscopy (EIS) plots of Co@HNCs (500), Co@HNCs (600), Co@HNCs (700) electrodes at 0.87 V (vs. RHE) for ORR and the equivalent circuit ( $R_s$ : ohm resistance,  $R_{ct}$ : charge transfer resistance,  $C_d$ : capacity)

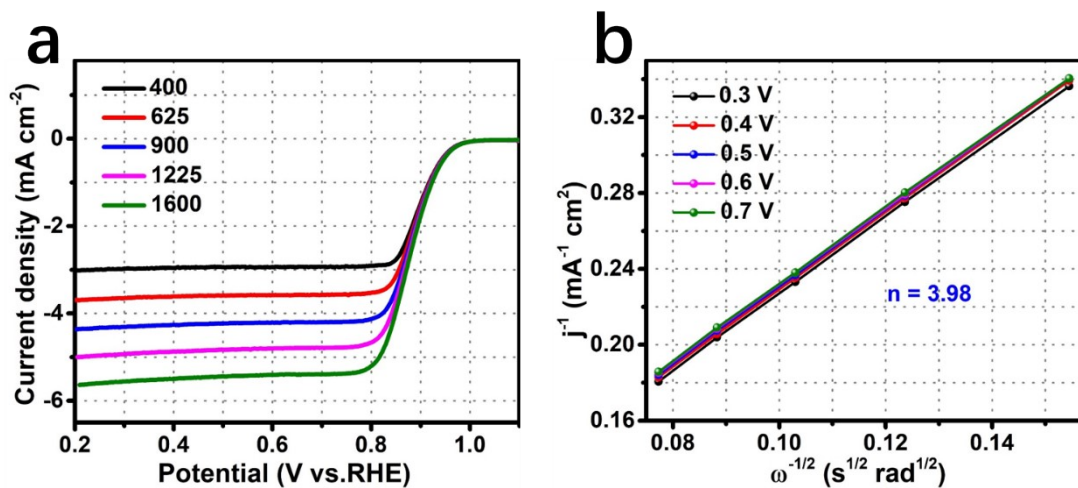

**Figure S13.** (a) LSV at different rotating speed in  $O_2$ -saturated 0.1 M KOH solution of Co@HNCs (600) and (b) The corresponding Koutecky-Levich (K-L) plots of  $j^{-1}$  vs  $\omega^{-1/2}$  at different potentials derived from the LSV data.



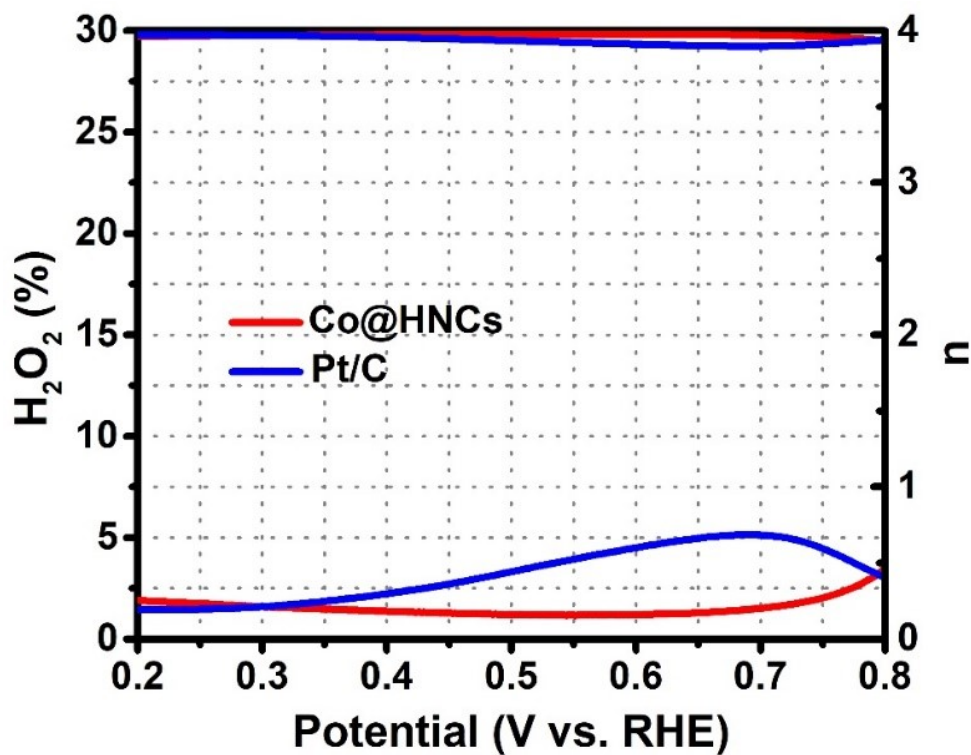

Figure S14. H<sub>2</sub>O<sub>2</sub> yield and electron transfer number for Co@HNCs (600) and Pt/C sample.

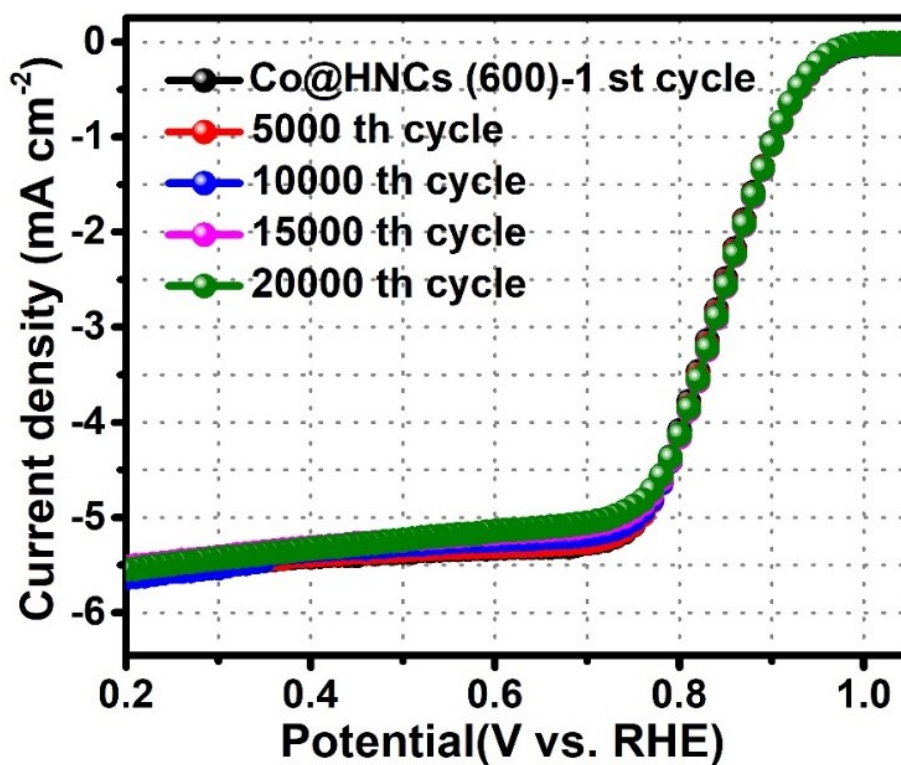

Figure S15. LSV curves for Co@HNCs (600) sample before and after 20000 cycles.

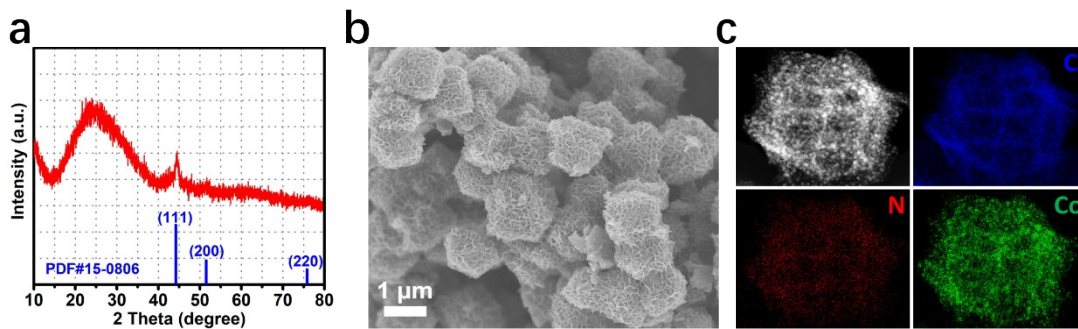

**Figure S16.** (a) XRD pattern, (b)SEM image, (c)and element mapping of Co@HNCs (600) after ORR

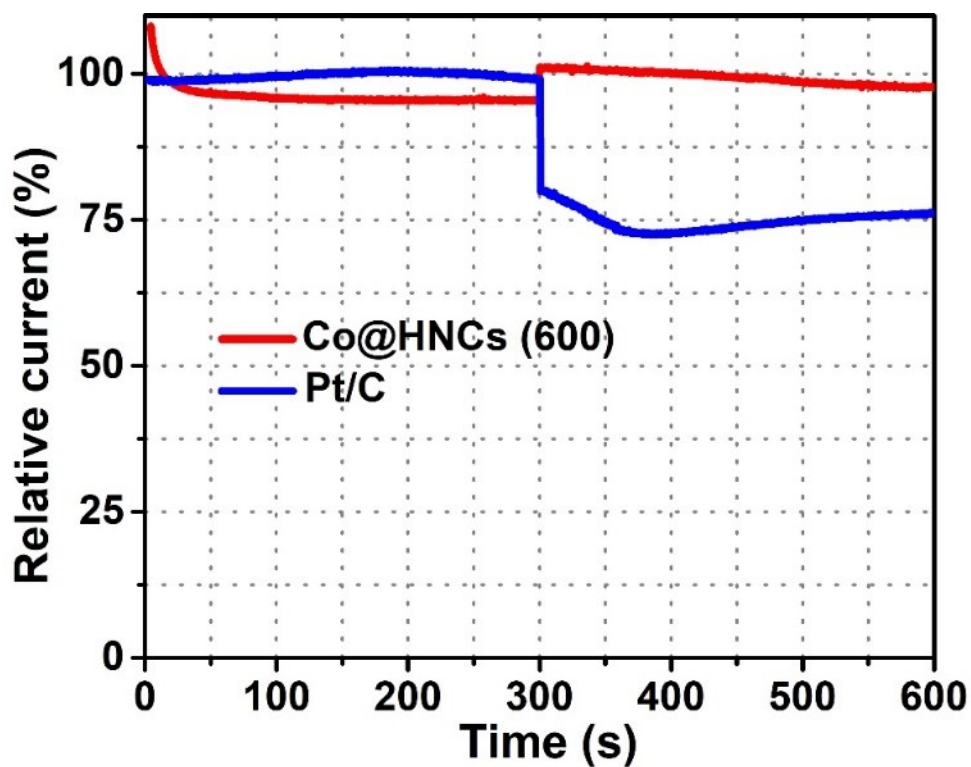

**Figure S17.** Methanol crossover resistance test of Co@HNCs (600) and Pt/C catalysts.

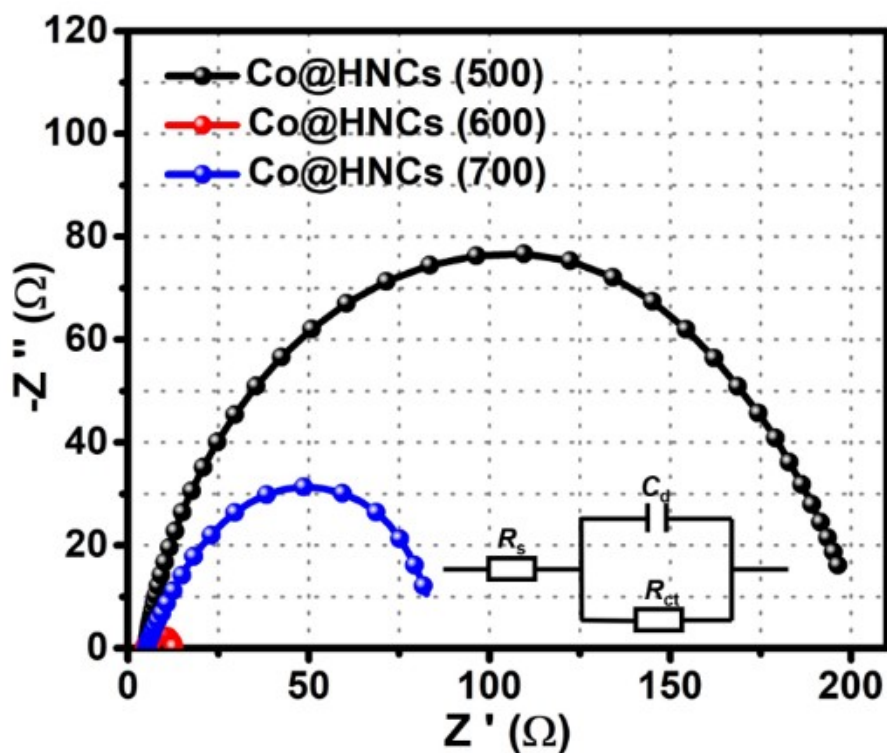

**Figure S18.** Electrochemical impedance spectroscopy (EIS) plots of Co@HNCs (500), Co@HNCs (600), Co@HNCs (700) electrodes at 1.6 V (vs. RHE) for OER and the equivalent circuit ( $R_s$ : ohm resistance,  $R_{ct}$ : charge transfer resistance,  $C_d$ : capacity)

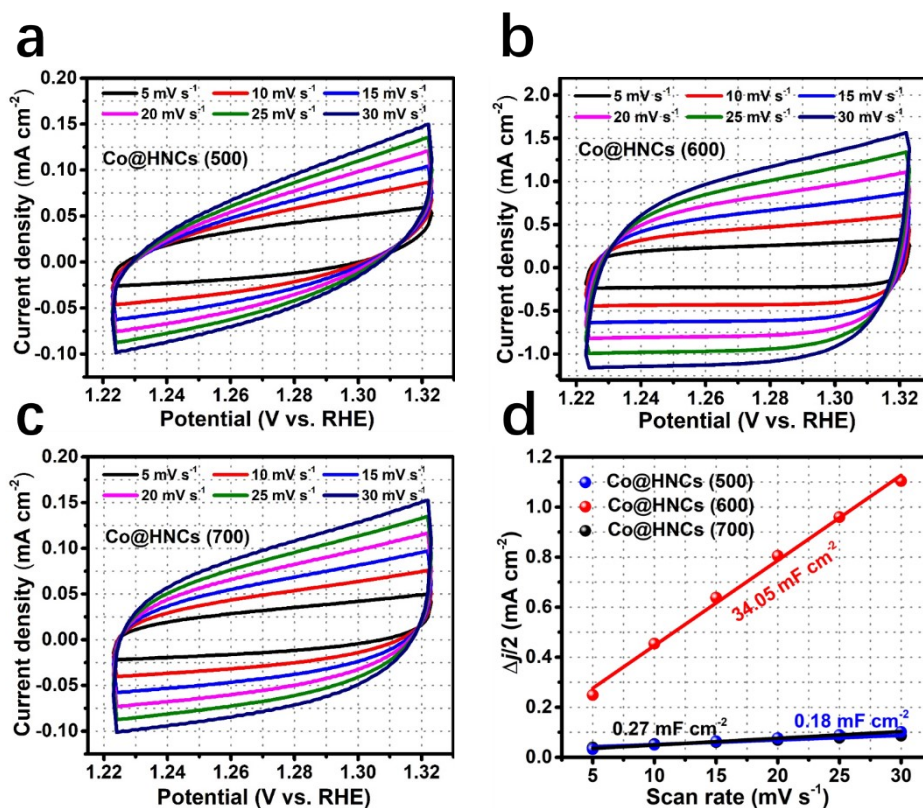

**Figure S19.** Cyclic voltammograms curves for (a) Co@HNCs (500), (b) Co@HNCs (600)

(600) and (c) Co@HNCs (700) in the region of 1.223 ~1.323 V vs. RHE at various scan rates. (d) The differences in current density variation ( $\Delta j = j_a - j_c$ ) at the potential of 1.273 V vs. RHE plotted against scan rate fitted to estimate the electrochemical double-layer capacitances ( $C_{dl}$ ).

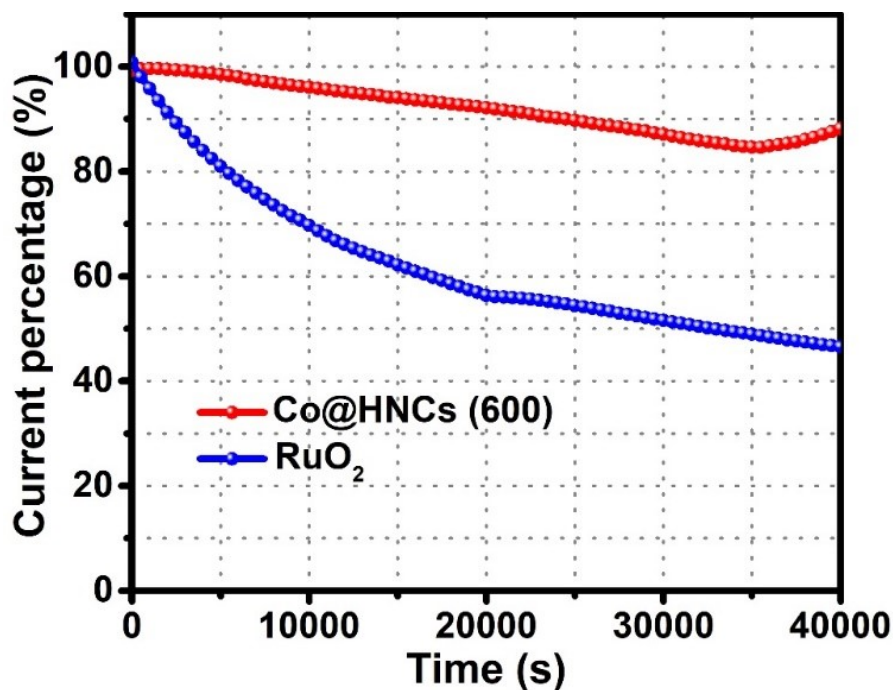

Figure S20. OER endurance test of Co@HNCs (600) catalyst in 1 M KOH.

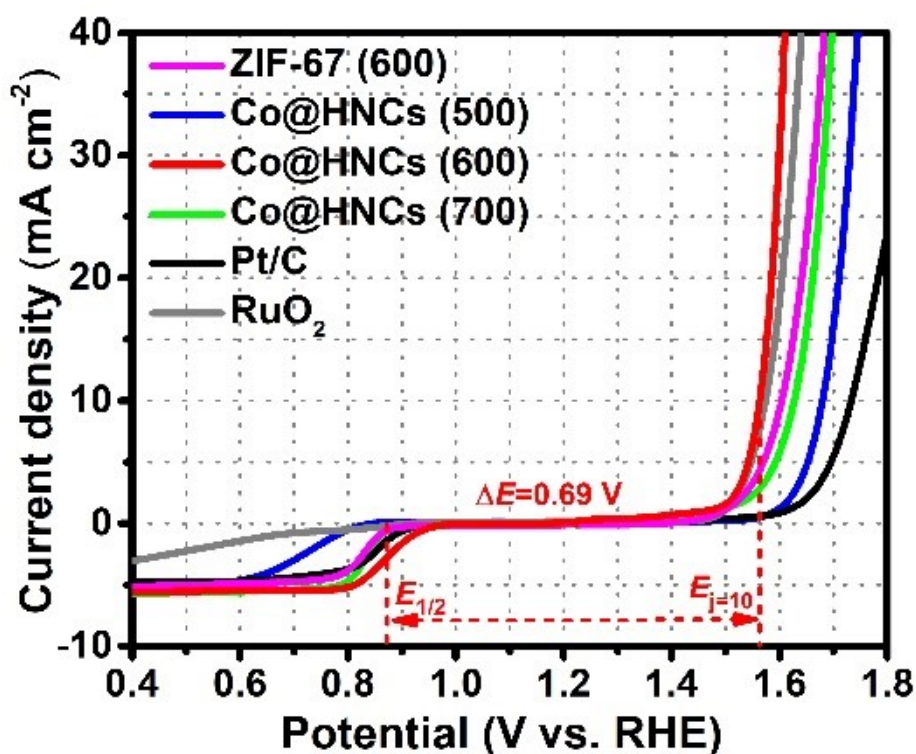

Figure S21. Bifunctional polarization profiles for various catalysts.

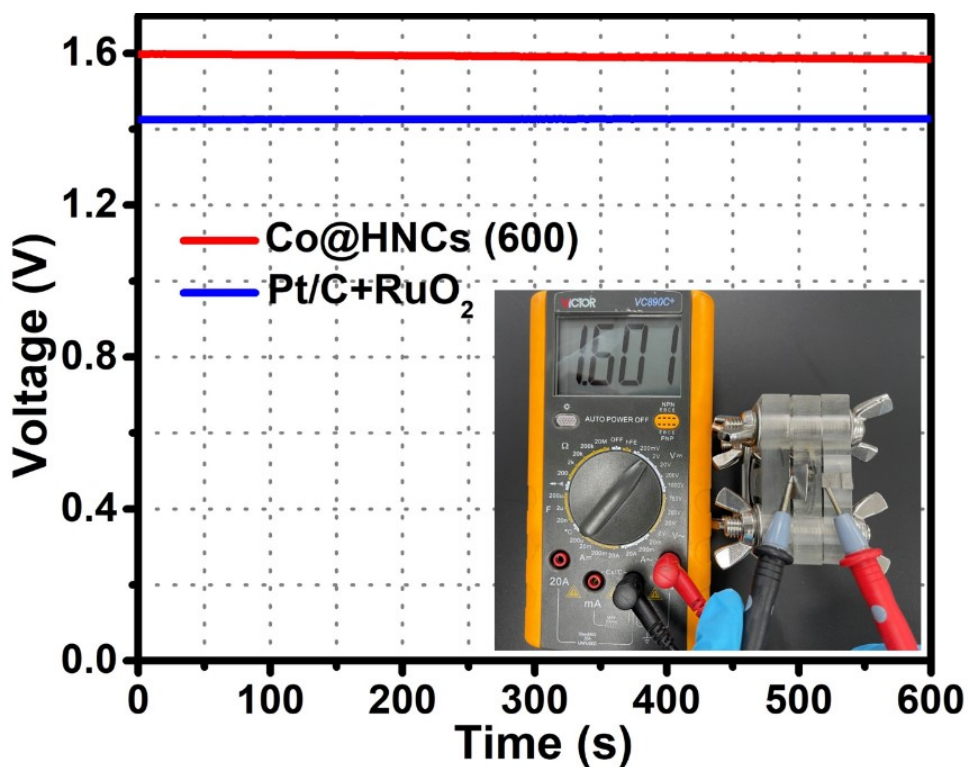

**Figure S22.** Open-circuit plots of Zn–air batteries using Co@HNCs (600) and commercial Pt/C+RuO<sub>2</sub> as the cathodic catalysts (insert shows the visual photographic image of OCV of Co@HNCs (600)-based Zn–air battery).

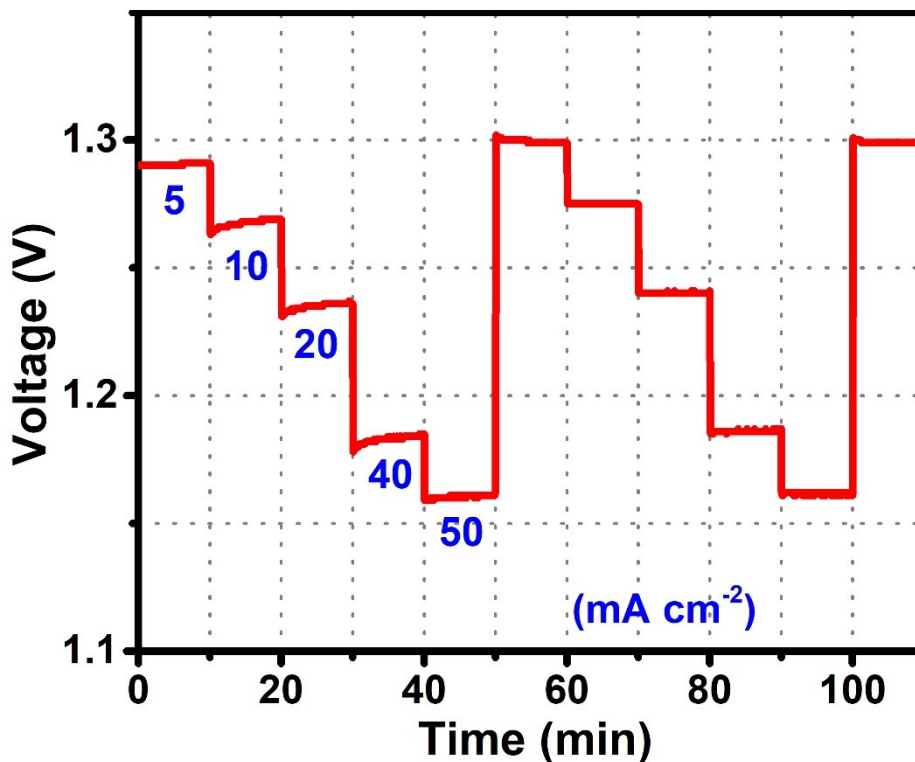

**Figure S23.** Galvanostatic discharge curves of the primary Zn–air batteries with Co@HNCs (600) as cathodic catalysts.

Co@HNCs (600) as cathode catalysts at different current densities.

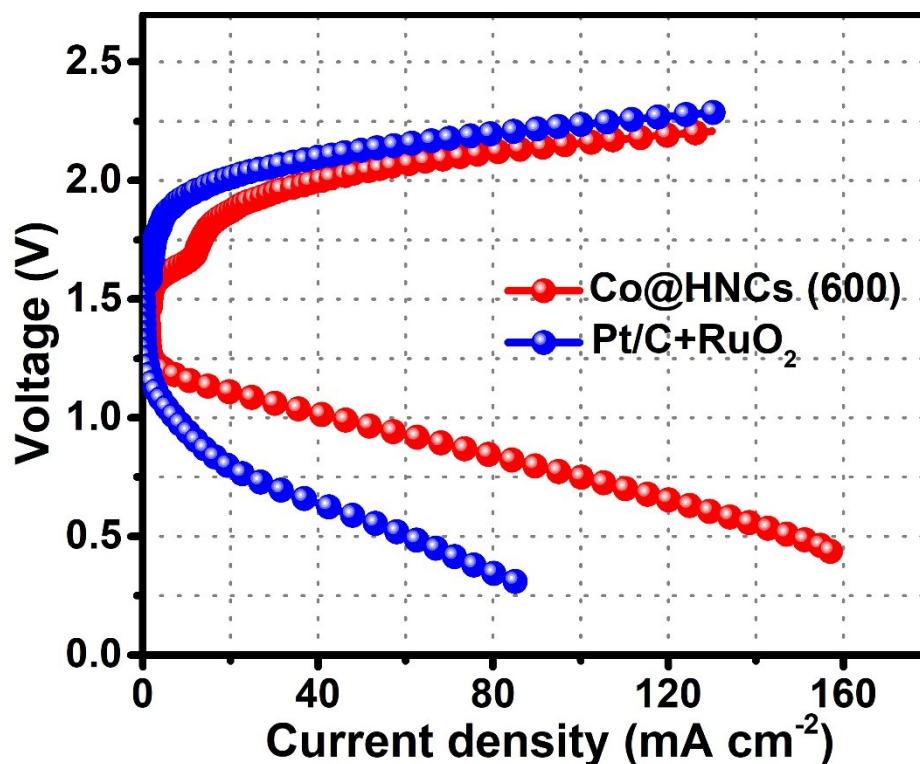

**Figure S24.** Polarization curves of Zn-air batteries based on as-prepared catalysts and commercial Pt/C+RuO<sub>2</sub> catalyst.

**Table S1.** The Comparison of ORR performance of non-precious Co@HNCs(600) catalysts from the recent literature and this work (0.1 M KOH medium).

| Catalysts                                  | Half-wave potential | Onset potential (V vs. RHE) | Electron transfer numbers | Reference                                   |
|--------------------------------------------|---------------------|-----------------------------|---------------------------|---------------------------------------------|
| <b>Co@HNCs (600)</b>                       | <b>0.87</b>         | <b>0.98</b>                 | <b>3.98</b>               | <b>This work</b>                            |
| Co SA+Co <sub>9</sub> S <sub>8</sub> /HCNT | 0.855 V             | 0.90 V                      | 3.99                      | Small, 2020, 16, 1906735.                   |
| Co-Co <sub>3</sub> O <sub>4</sub> @NAC     | 0.795               | 0.935                       | 3.8                       | Appl. Catal. B, 2020, 260, 118188.          |
| Co-pyridinic N-C                           | 0.87                | 0.99                        | 3.88-3.99                 | Adv. Energy Mater., 2020, 10, 2002592.      |
| Zn/CoN-C                                   | 0.861               | 1.004                       | 3.88                      | Angew. Chem. Int. Ed., 2019, 58, 2622–2626. |
| Co-SAs@NC                                  | 0.82                | 0.96                        | 3.9                       | Angew. Chem. Int. Ed., 2019, 58,            |

|                      |         |         |           |                                            |
|----------------------|---------|---------|-----------|--------------------------------------------|
|                      |         |         |           | 5359-5364.                                 |
| Co-N-C- 900          | 0.87    | 0.928   | 3.70-3.93 | Adv. Energy Mater., 2018, 8, 1801956.      |
| NC-Co SA             | 0.87    | 1.0     | 4.07      | ACS Catal., 2018, 8, 8961–8969.            |
| Co SAs/PTF           | 0.808 V | 0.89 V  | 3.92–3.97 | J. Mater. Chem. A, 2019, 7, 1252–1259.     |
| CoN <sub>4</sub> /NG | 0.87 V  | 0.96 V  | 3.92-4.0  | Nano Energy, 2018, 50, 691–698.            |
| Co@MCM               | 0.78 V  | 0.95 V  | 3.7       | Energy Environ. Sci., 2018, 11, 1980–1984. |
| A-Co@ CMK-3-D        | 0.835 V | 0.946 V | 3.9       | Small Methods, 2019, 3, 1800450.           |
| Co-ISAS/p-CN         | 0.838 V | 0.92 V  | 3.9       | Adv. Mater., 2018, 30, 1706508.            |
| Co-POC               | 0.83 V  | 0.90 V  | 3.6       | Adv. Mater., 2019, 31, 1900592.            |
| Co-N/CNFs            | 0.82    | 0.92    | 3.4       | ACS Catal., 2017, 7, 6864–6871.            |
| N-CNTs-650           | 0.85    | 0.94    | 3.93      | J. Am. Chem. Soc., 2017, 139, 8212–8221.   |
| Fe-N/P-C-700         | 0.867   | 0.941   | 3.94      | J. Am. Chem. Soc., 2020, 142, 2404–2412.   |

**Table S2.** The Comparison of OER performance of non-precious Co@HNCs (600) catalysts from the recent literature and this work (1 M KOH medium).

| Catalysts                               | $\eta@10 \text{ mA/cm}^2$<br>(mV) | Tafel slop (mV/<br>dec) | Reference                          |
|-----------------------------------------|-----------------------------------|-------------------------|------------------------------------|
| <b>Co@HNCs (600)</b>                    | <b>344</b>                        | <b>88</b>               | <b>This work</b>                   |
| Co-Co <sub>3</sub> O <sub>4</sub> @NAC  | 380                               | NA                      | Appl. Catal. B, 2020, 260, 118188. |
| Co-N,B-CSs                              | 430                               | NA                      | ACS Nano, 2018, 12, 1894–1901.     |
| Co <sub>3</sub> O <sub>4</sub> /HNCP-40 | 333                               | 69.0                    | ACS Catal., 2018, 8, 7879–7888.    |

|                                                              |     |      |                                              |
|--------------------------------------------------------------|-----|------|----------------------------------------------|
| CoCePi                                                       | 374 | 75.0 | Small, 2018, 14,<br>1704403.                 |
| CoNiPi                                                       | 402 | 87.0 | Small, 2018, 14,<br>1704403.                 |
| NiCo <sub>2</sub> O <sub>4</sub> @MnO <sub>2</sub> -<br>CNTs | 400 | 92   | Nanoscale, 2018,<br>10, 13626.               |
| NMC/Co@CNTs                                                  | 500 | 79   | Langmuir, 2018,<br>34, 1992–1998.            |
| FeS/Fe <sub>3</sub> C@N-S-C-<br>800                          | 570 | 81   | Adv. Funct.<br>Mater., 2018, 28,<br>1803973. |
| FeNi-COP-800                                                 | 400 | 91   | Appl. Catal. B,<br>2019, 243,<br>204–211.    |

$\eta$  = Overpotential; NA = not attained.
